# Supplementary material for: The Synthesis of the Pomegranate-Shaped α-Fe2O3 Using an In Situ Corrosion Method of Scorodite and Its Gas-Sensitive Property
Source: MDPI journal article supplement (doi:10.3390/nano9070977), 2019-07-04
Supplement: s1 [file s1]

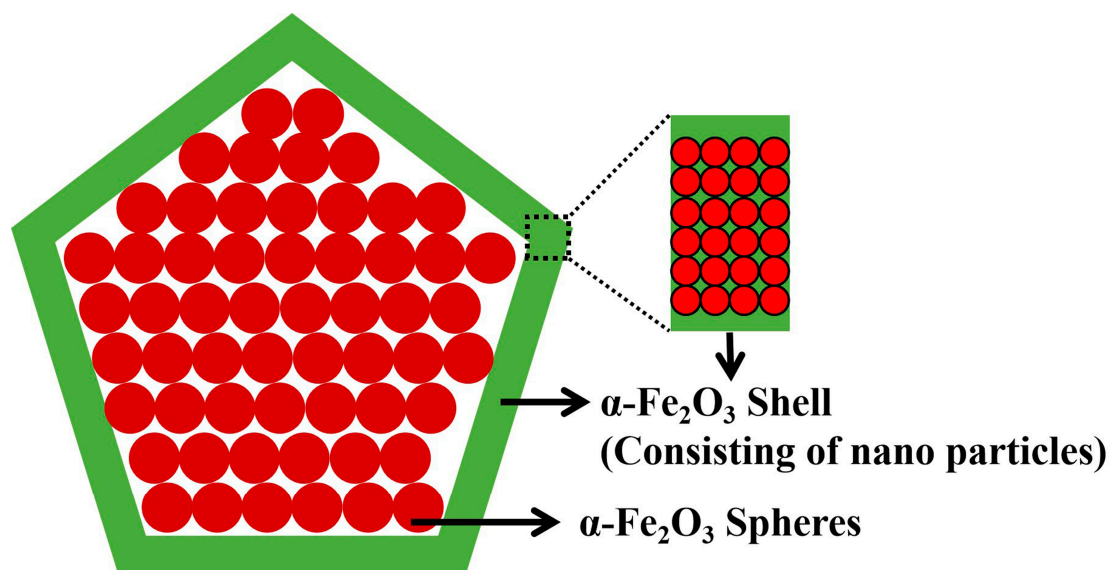

Figure S1. the schematic diagram of pomegranate shape.

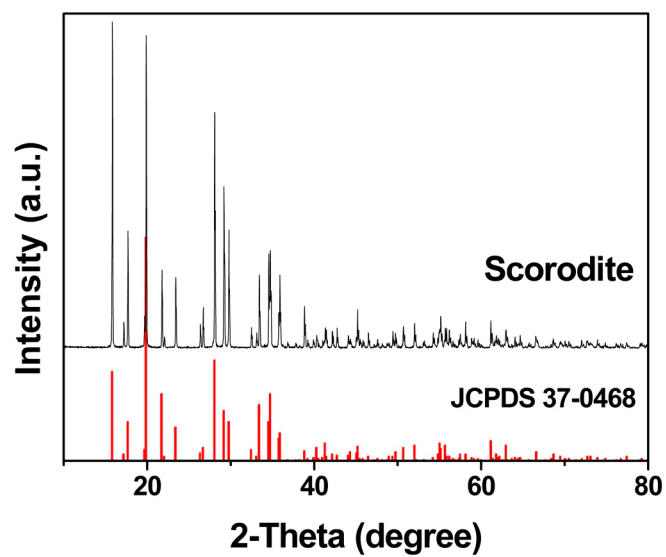

Figure S2. the XRD pattern of as-synthesized scorodite

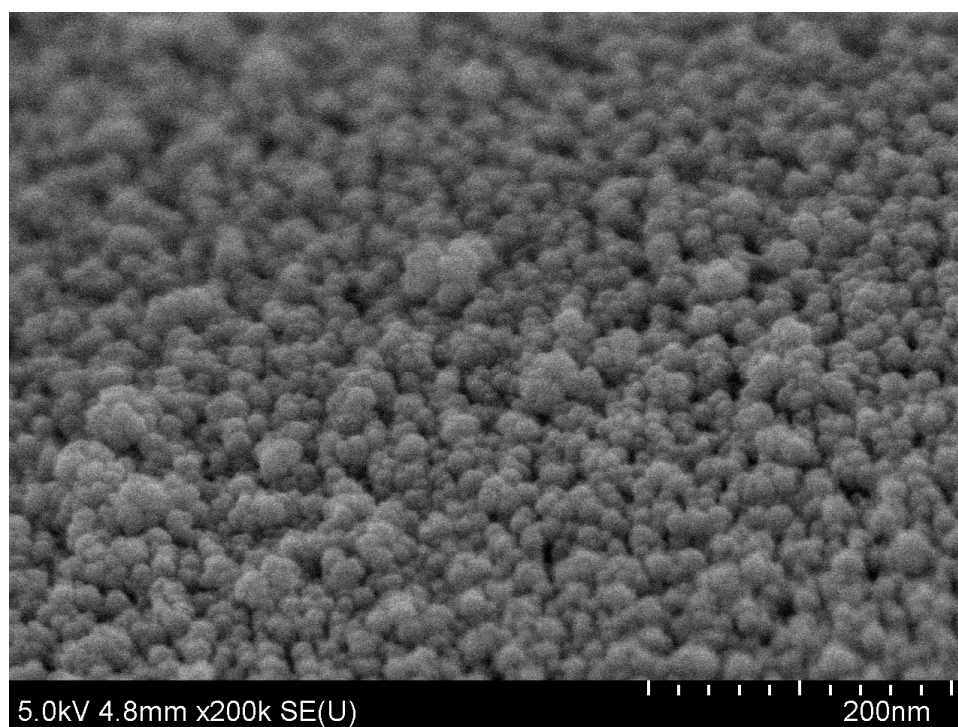

Figure S3. the high magnification SEM image of the surface for S1

#### 1. Synthesis of scorodite

The scorodite was prepared by atmospheric method. Highly purity  $O_2$  was injected into the aqueous solution which included As(V) and Fe(II) ions at 90 °C. 20 g/L aqueous As(V) solution was prepared from the dissolution of  $Na_3AsO_4 \cdot 12H_2O$ , and pH of the solution was adjusted 1.0 by 98 %  $H_2SO_4$ . The As(V) solution with 20 g/L As(V) concentration was reacted with  $FeSO_4 \cdot 7H_2O$  in a three-necked flask, and the molar ratio of Fe(II) and As(V) ions was 3:2. The solution was heated by oil bath and stirred at 1000 rpm until the system achieved the reaction temperature (90 °C). Afterwards, highly purity  $O_2$  was injected into the solution, reacting for 7 hours at 90 °C. Then the suspension was filtered and washed with deionized water, and dried in an oven at 70 °C to obtain the scorodite.
